# Supplementary material for: Multidimensional redox potential/pKa coupling in multicopper oxidases from molecular dynamics: implications for the proton transfer mechanism
Source: Royal Society of Chemistry journal article supplement (doi:10.1039/d1cp03095g), 2021-01-01
Supplement: d1cp03095g1.pdf [file d1cp03095g1.pdf]

## Supporting Information

Anderson A. E. Santo<sup>1</sup>, Vitor Hugo R. Lazaroti, and Gustavo T. Feliciano<sup>1</sup>

*Institute of Chemistry, São Paulo State University, Araraquara, SP, Brazil*

E-mail: anderson.santo@unesp.br; gustavo.troiano@unesp.br

## Trinuclear cluster parameterization

Table S1: RESP charges used in the parameterization of the tautomeric imidazole ring of histidines in the trinuclear cluster with copper ions.

| <b>HIS T3</b>    | <b>Charge (ua)</b> | <b>HIS T3</b>    | <b>Charge (ua)</b> | <b>HIS T2</b>    | <b>Charge (ua)</b> |
|------------------|--------------------|------------------|--------------------|------------------|--------------------|
| CB               | -0.3384            | CB               | -0.2365            | CB               | -0.3243            |
| HB1              | 0.1649             | HB1              | 0.1179             | HB1              | 0.15760            |
| HB2              | 0.1649             | HB2              | 0.1179             | HB2              | 0.15760            |
| CG               | 0.2436             | CG               | 0.2767             | CG               | 0.3549             |
| ND1              | -0.3081            | ND1              | -0.3432            | ND1              | -0.3691            |
| HD1              | 0.3658             | CD2              | -0.3095            | HD1              | 0.3786             |
| CD2              | -0.2280            | HD2              | 0.2348             | CD2              | -0.3345            |
| HD2              | 0.1892             | CE1              | 0.0378             | HD2              | 0.2223             |
| CE1              | 0.0378             | HE1              | 0.1712             | CE1              | 0.0285             |
| HE1              | 0.1712             | NE2              | -0.2416            | HE1              | 0.2212             |
| NE2              | -0.2788            | HE2              | 0.3706             | NE2              | -0.2021            |
| Cu <sup>+</sup>  | 0.4351             | Cu <sup>+</sup>  | 0.4351             | Cu <sup>+</sup>  | 0.4351             |
| <b>HIS T3</b>    | <b>Charge (ua)</b> | <b>HIS T3</b>    | <b>Charge (ua)</b> | <b>HIS T2</b>    | <b>Charge (ua)</b> |
| CB               | -0.3160            | CB               | -0.3729            | CB               | -0.3027            |
| HB2              | 0.1865             | HB2              | 0.1793             | HB2              | 0.1816             |
| HB3              | 0.1864             | HB3              | 0.1793             | HB3              | 0.1816             |
| CG               | 0.2981             | CG               | 0.3283             | CG               | 0.3270             |
| ND1              | -0.2613            | ND1              | -0.4219            | ND1              | -0.2427            |
| HD1              | 0.3841             | CD2              | -0.2602            | HD1              | 0.3816             |
| CD2              | -0.3023            | HD2              | 0.2646             | CD2              | -0.3105            |
| HD2              | 0.2235             | CE1              | 0.0474             | HD2              | 0.2324             |
| CE1              | 0.0474             | HE1              | 0.1935             | CE1              | 0.0054             |
| HE1              | 0.1935             | NE2              | -0.2152            | HE1              | 0.2476             |
| NE2              | -0.3192            | HE2              | 0.3988             | NE2              | -0.2937            |
| Cu <sup>2+</sup> | 1.0377             | Cu <sup>2+</sup> | 1.0377             | Cu <sup>2+</sup> | 1.1835             |

## Results

Table S2: Pka state of acid residues near the trinuclear cluster.  $pK_a$ : The predicted  $pK_a$ .

**Offset:**The difference between the predicted  $pK_a$  and the system pH.

| T3'' | T3' | T2 | Resid | pKa       | Offset    | T3'' | T3' | T2 | Resid | pKa       | Offset    |
|------|-----|----|-------|-----------|-----------|------|-----|----|-------|-----------|-----------|
| +    | +   | +  | D105  | 4.92      | -2.27     | 2+   | 2+  | 2+ | D105  | 2.80      | -4.39     |
| +    | +   | +  | E109  | 6.11      | -1.09     | 2+   | 2+  | 2+ | E109  | 7.46      | 0.26      |
| +    | +   | +  | D135  | $-\infty$ | $-\infty$ | 2+   | 2+  | 2+ | D135  | $-\infty$ | $-\infty$ |
| +    | +   | +  | E275  | 5.64      | -1.55     | 2+   | 2+  | 2+ | E275  | $-\infty$ | $-\infty$ |
| +    | +   | +  | D430  | 6.66      | -0.53     | 2+   | 2+  | 2+ | D430  | 4.65      | -2.54     |
| +    | +   | +  | Y45   | $\infty$  | $\infty$  | 2+   | 2+  | 2+ | Y45   | $\infty$  | $\infty$  |
| +    | +   | +  | 3     | 10.82     | 3.62      | 2+   | 2+  | 2+ | 3     | $\infty$  | $\infty$  |
| +    | +   | +  | E463  |           |           | 2+   | 2+  | 2+ | E463  | 8.71      | 1.51      |
| 2+   | +   | 2+ | D105  | 3.90      | -3.29     | 2+   | 2+  | +  | D105  | 4.26      | -2.93     |
| 2+   | +   | 2+ | E109  | 7.34      | 0.14      | 2+   | 2+  | +  | E109  | 6.72      | -0.48     |
| 2+   | +   | 2+ | D135  | $-\infty$ | $-\infty$ | 2+   | 2+  | +  | D135  | $-\infty$ | $-\infty$ |
| 2+   | +   | 2+ | E275  | $-\infty$ | $-\infty$ | 2+   | 2+  | +  | E275  | $-\infty$ | $-\infty$ |
| 2+   | +   | 2+ | D430  | 7.80      | 0.60      | 2+   | 2+  | +  | D430  | 2.35      | -4.84     |
| 2+   | +   | 2+ | Y45   | $\infty$  | $\infty$  | 2+   | 2+  | +  | Y45   | $\infty$  | $\infty$  |
| 2+   | +   | 2+ | 3     | 9.16      | 1.96      | 2+   | 2+  | +  | 3     | 9.43      | 2.23      |
| 2+   | +   | 2+ | E463  |           |           | 2+   | 2+  | +  | E463  |           |           |
| 2+   | +   | +  | D105  | 6.51      | -0.68     | +    | +   | 2+ | D105  | 5.08      | -2.11     |
| 2+   | +   | +  | E109  | 7.83      | 0.63      | +    | +   | 2+ | E109  | 6.67      | -0.52     |
| 2+   | +   | +  | D135  | $-\infty$ | $-\infty$ | +    | +   | 2+ | D135  | $-\infty$ | $-\infty$ |
| 2+   | +   | +  | E275  | $-\infty$ | $-\infty$ | +    | +   | 2+ | E275  | $-\infty$ | $-\infty$ |
| 2+   | +   | +  | D430  | $-\infty$ | $-\infty$ | +    | +   | 2+ | D430  | $-\infty$ | $-\infty$ |
| 2+   | +   | +  | Y45   | $-\infty$ | $-\infty$ | +    | +   | 2+ | Y45   | $-\infty$ | $-\infty$ |
| 2+   | +   | +  | 3     | $\infty$  | $\infty$  | +    | +   | 2+ | 3     | $\infty$  | $\infty$  |
| 2+   | +   | +  | E463  | 9.62      | 2.42      | +    | +   | 2+ | E463  | 9.81      | 2.61      |
| +    | 2+  | +  | D105  | 4.47      | -2.73     | +    | 2+  | 2+ | D105  | $-\infty$ | $-\infty$ |
| +    | 2+  | +  | E109  | 6.15      | -1.04     | +    | 2+  | 2+ | E109  | 6.19      | -1.00     |
| +    | 2+  | +  | D135  | $-\infty$ | $-\infty$ | +    | 2+  | 2+ | D135  | $-\infty$ | $-\infty$ |
| +    | 2+  | +  | E275  | $-\infty$ | $-\infty$ | +    | 2+  | 2+ | E275  | 6.10      | -1.09     |
| +    | 2+  | +  | D430  | 4.27      | -2.92     | +    | 2+  | 2+ | D430  | 6.96      | -0.23     |
| +    | 2+  | +  | Y45   | $\infty$  | $\infty$  | +    | 2+  | 2+ | Y45   | $\infty$  | $\infty$  |
| +    | 2+  | +  | 3     | 8.82      | 1.62      | +    | 2+  | 2+ | 3     | 9.70      | 2.50      |
| +    | 2+  | +  | E463  |           |           | +    | 2+  | 2+ | E463  |           |           |
